# Supplementary material for: Novel human pluripotent stem cell-derived hypothalamus organoids demonstrate cellular diversity
Source: PubMed Central journal article supplement — iScience. 2023 Aug 2;26(9):107525. doi: 10.1016/j.isci.2023.107525 (PMC10460991; doi:10.1016/j.isci.2023.107525), 2023-08-02
Supplement: mmc1.pdf [file mmc1.pdf]

**Supplemental information**

**Novel human pluripotent stem  
cell-derived hypothalamus organoids  
demonstrate cellular diversity**

**Lily Sarrafha, Drew R. Neavin, Gustavo M. Parfitt, Ilya A. Kruglikov, Kristen Whitney, Ricardo Reyes, Elena Coccia, Tatyana Kareva, Camille Goldman, Regine Tipon, Gist Croft, John F. Crary, Joseph E. Powell, Joel Blanchard, and Tim Ahfeldt**

## Supplemental Figures and Legends

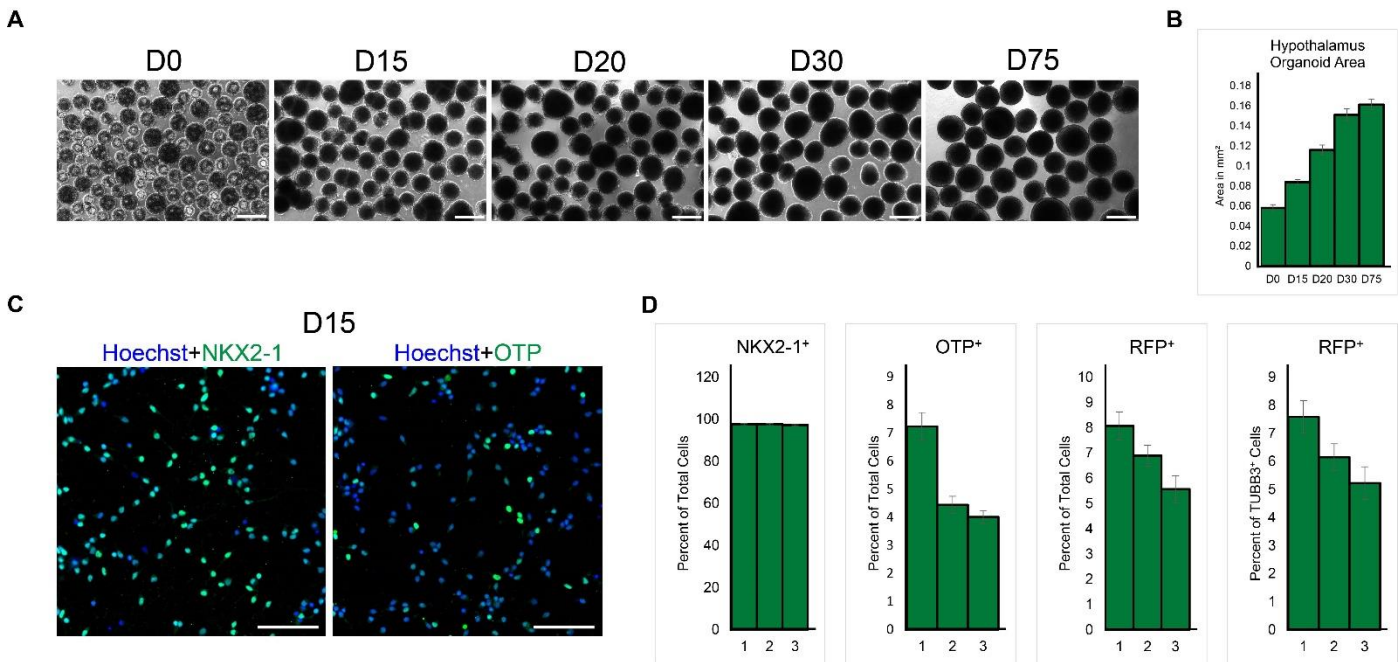

### Figure S1 – Characterization of hypothalamus organoid size and patterning.

A) Brightfield images of organoids at several timepoints during differentiation. Scale bars: 500  $\mu\text{m}$ .

B) Quantification of organoid area from A and similar images, showing an increase in size over time ( $n = 50$ ; 25 organoids in duplicates were pooled together for quantification). Organoid area is shown in  $\text{mm}^2$ . Error bars represent SEM. SEM, standard error of the mean.

C) IF staining in D15 monolayer neurons for NKX2-1 and OTP. Hoechst was used as a nuclear marker. Scale bars: 100  $\mu\text{m}$ .

D) Quantification of Figures 1B, S1C, and similar images for NKX2-1<sup>+</sup>, OTP<sup>+</sup>, and RFP<sup>+</sup> cells as a percentage of total cells, as well as for RFP<sup>+</sup> cells as a percentage of  $\beta$ III Tubulin<sup>+</sup> cells ( $n = 30$  per replicate). The numbers on the x-axis denote technical replicates (or well of a 96-well plate imaged). Error bars represent SEM.

Related to Figure 1.

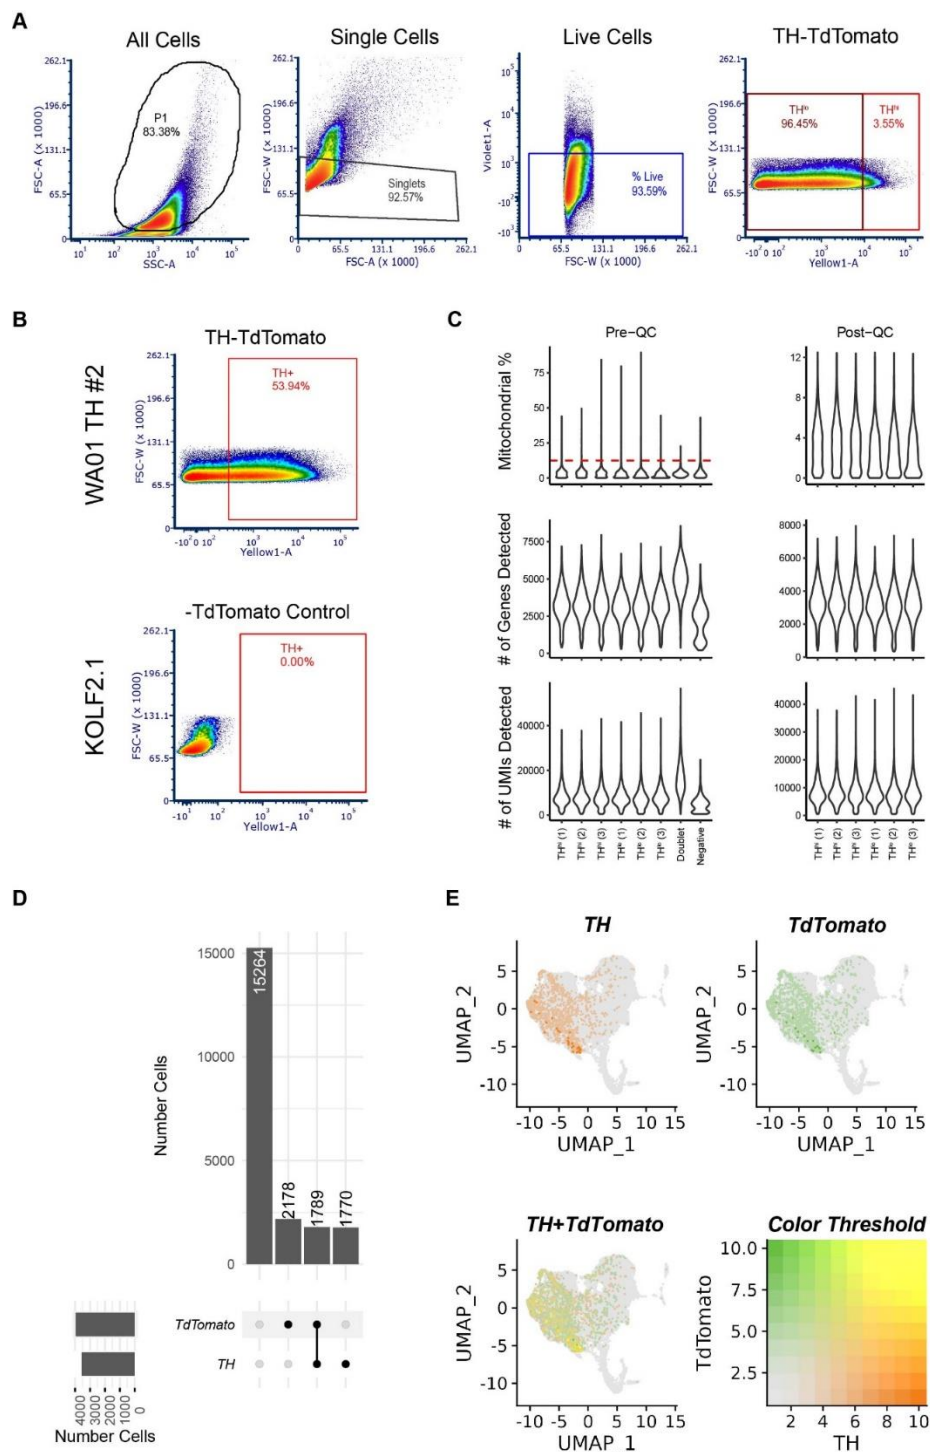

**Figure S2 – Sorting and scRNA-seq QC plots for D85 hypothalamus organoids.**

A) FACS gates for excluding cellular debris, doublets, and dead cells. The TH-TdTomato reporter was used to sort for two populations, TH<sup>hi</sup> and TH<sup>lo</sup>. FACS, fluorescence-activated cell sorting.

B) FACS gate showing the total TH<sup>+</sup> population in D85 hypothalamus organoids (top) in comparison to organoids differentiated from a -TdTomato control hPSC line, KOLF2.1J (bottom).

C) Violin plots for mitochondrial percent, number of genes detected, and number of UMIs detected for each replicate before and after the QC steps. The doublets, negative droplets, droplets without detectable hashtags, and cells with high mitochondrial percent were removed at the QC stage. UMI, unique molecular identifier; QC, quality control.

D) Upset plot showing the number of cells expressing TH, TdTomato, or both in the organoid dataset.

E) UMAP plots showing the expression of TH, TdTomato, or both in the organoid dataset.

Related to Figure 3.

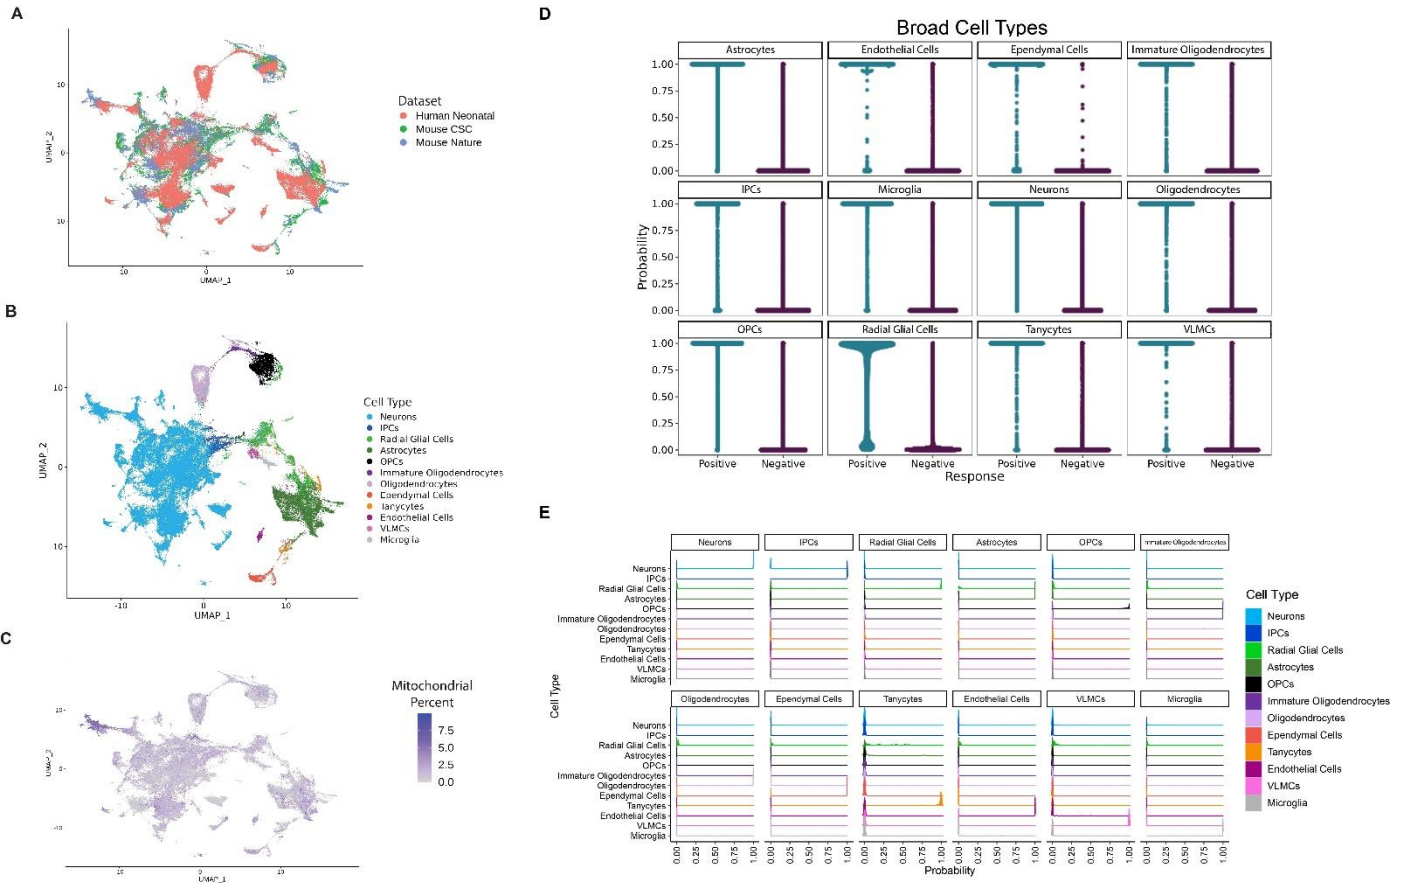

**Figure S3 – Characterization and application of the reference datasets to D85 hypothalamus organoids.**

A) UMAP plot showing the distribution the Human Neonatal<sup>19</sup>, Mouse CSC<sup>31</sup>, and Mouse Nature<sup>30</sup> references in the combined dataset.

B) UMAP plot of the 12 broad cell groups identified in the three references.

C) UMAP plot illustrating mitochondrial percent in the three datasets.

D) Training plots showing prediction probabilities for the 12 broad cell type categories that were applied from the three references to the hypothalamus organoid dataset to predict its cell types<sup>19,30,31</sup>.

E) Probability density plots showing high classification confidence for each of the 12 cell types identified in hypothalamus organoids.

Related to Figure 3.

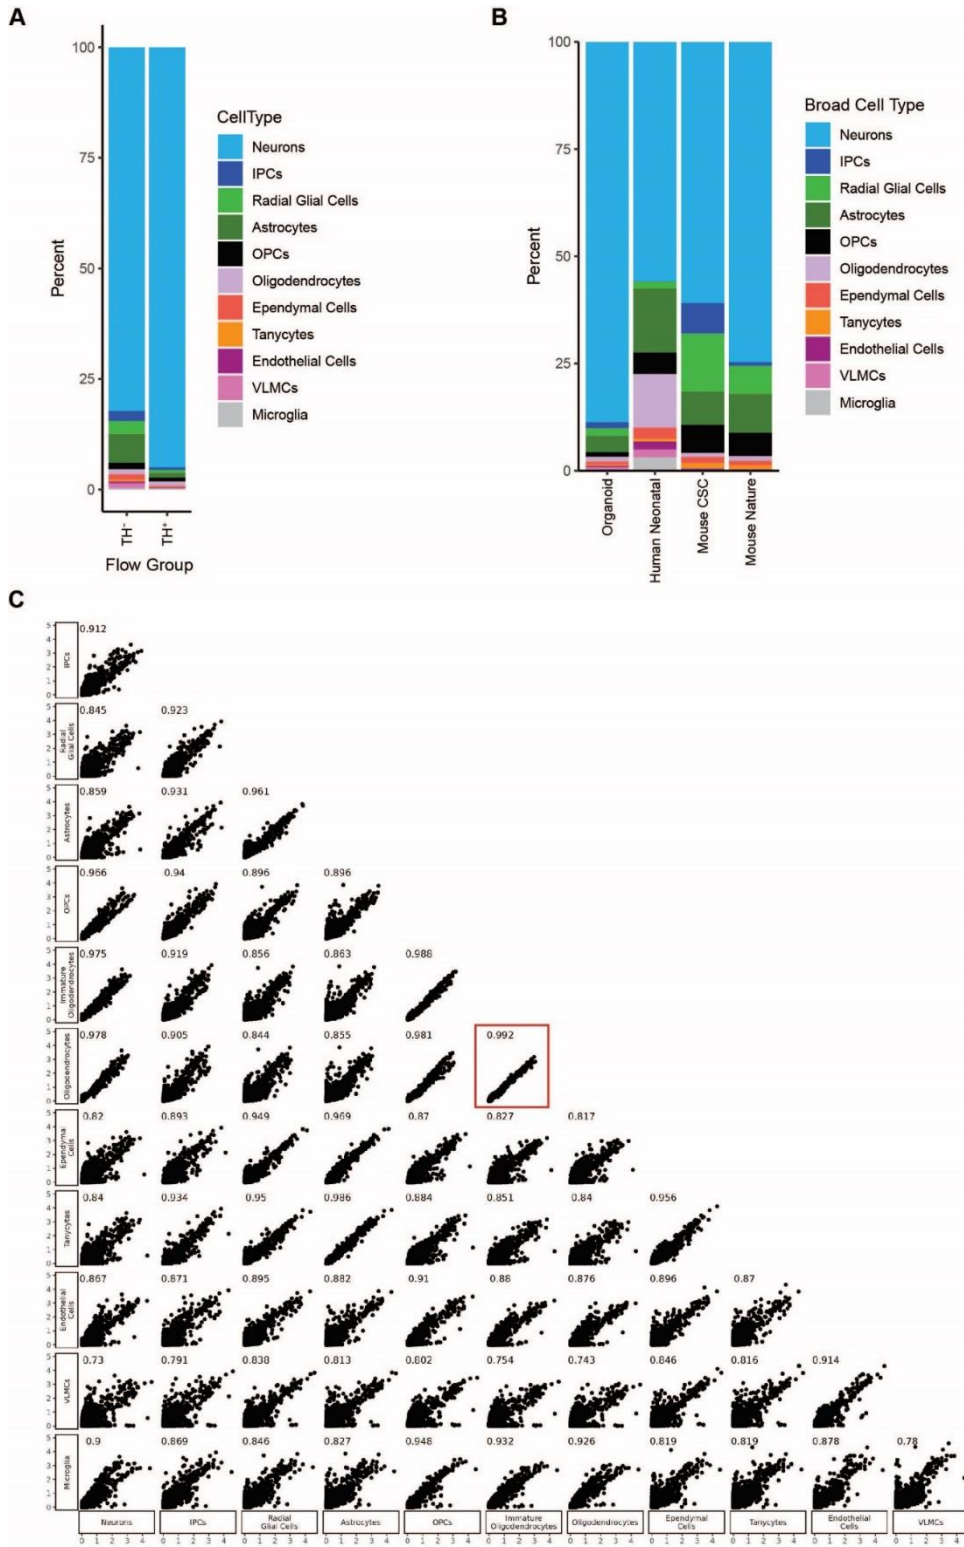

**Figure S4 – Comparison of transcriptional profile and cell group distribution.**

A) Bar plot comparing the percentage of each broad cell type in the hypothalamus organoids based on flow-sorted groups (TH<sup>+</sup> and TH<sup>-</sup>).

B) Bar plot comparing the percentage of each broad cell type between the hypothalamus organoids and the three reference datasets used for classification<sup>19,30,31</sup>.

C) Scatter plots illustrating the similarity correlation between different pairs of broad cell types. Red square marks the similarity between “Oligodendrocytes” and “Immature Oligodendrocytes” with a 0.992 correlation value.

Related to Figure 3.

A

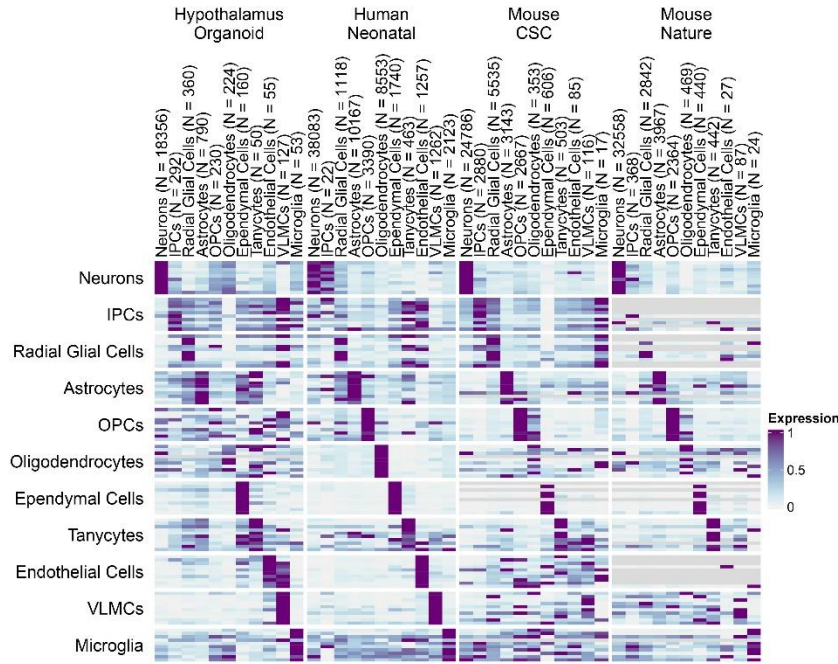

B

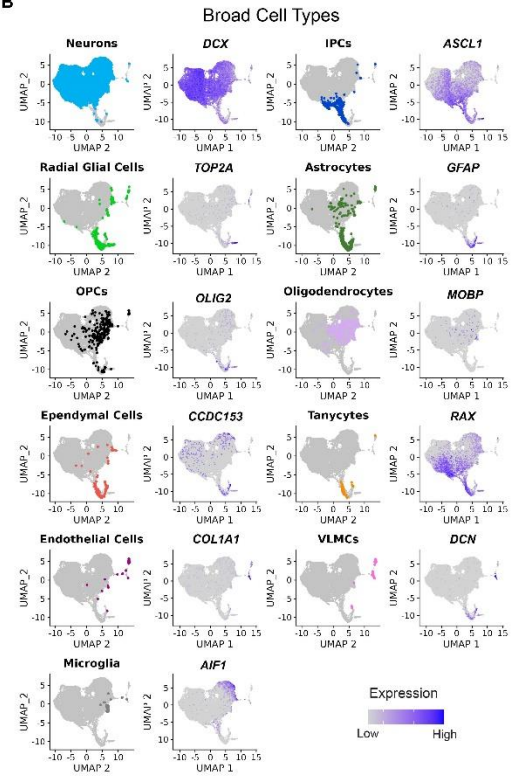

**Figure S5 – Gene expression across the broad cell types.**

A) The top 10 differentially expressed genes (DEGs) for each cell type were plotted for the hypothalamus organoids for comparison to the three references used for classification<sup>19,30,31</sup>. Grey coloring indicates genes that were not expressed in the dataset.

B) UMAP plots showing the annotated neuron subtype (columns 1 and 3) next to the expression of subtype representative markers (columns 2 and 4).

Related to Figure 3.

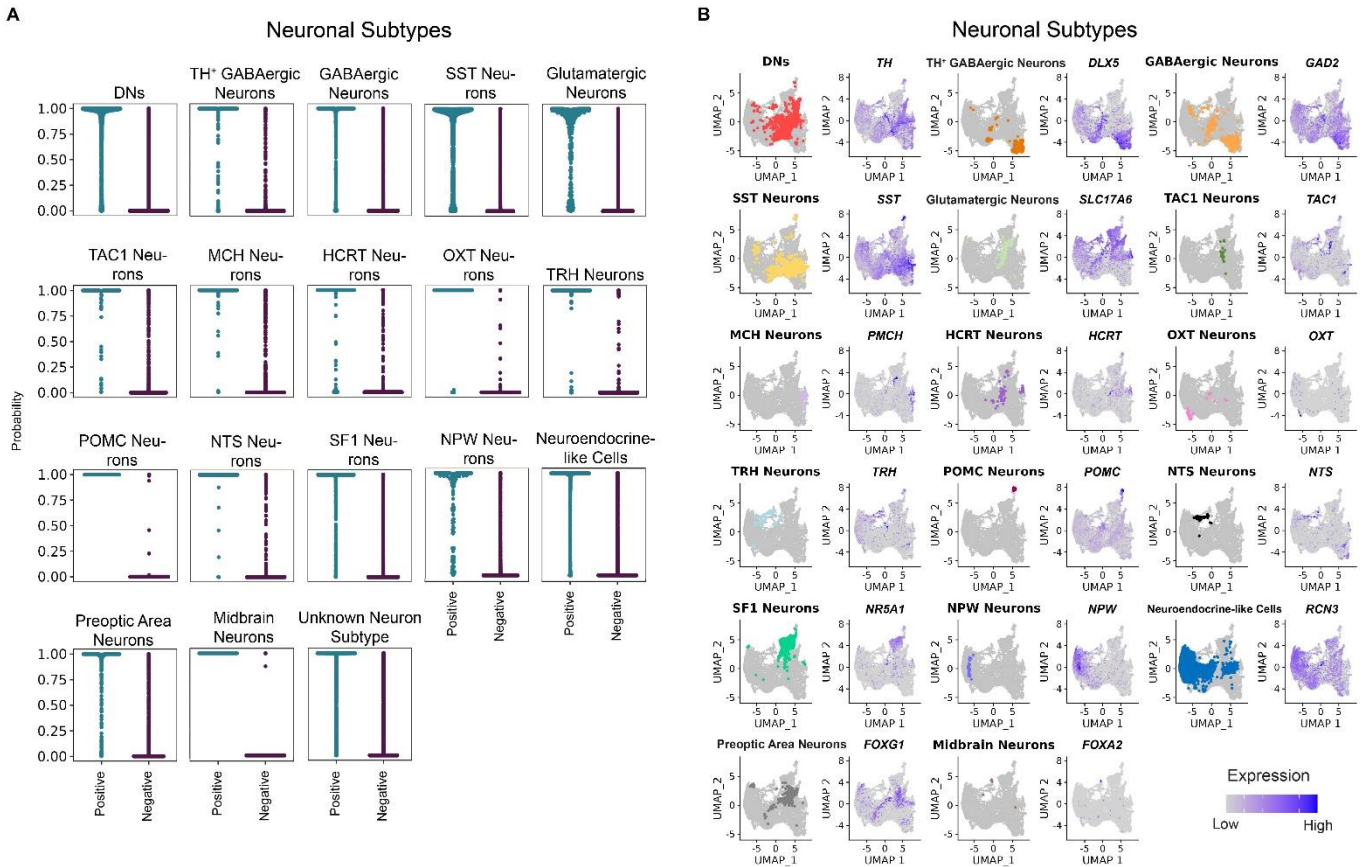

**Figure S6 – Neuronal subtype categories.**

A) Training plots showing prediction probabilities for the 17 neuronal subtype categories that were identified by unsupervised clustering.

B) UMAP plots showing the annotated neuron subtype (columns 1, 3, and 5) next to the expression of subtype representative markers for each subtype (columns 2, 4, and 6). Related to Figure 3.

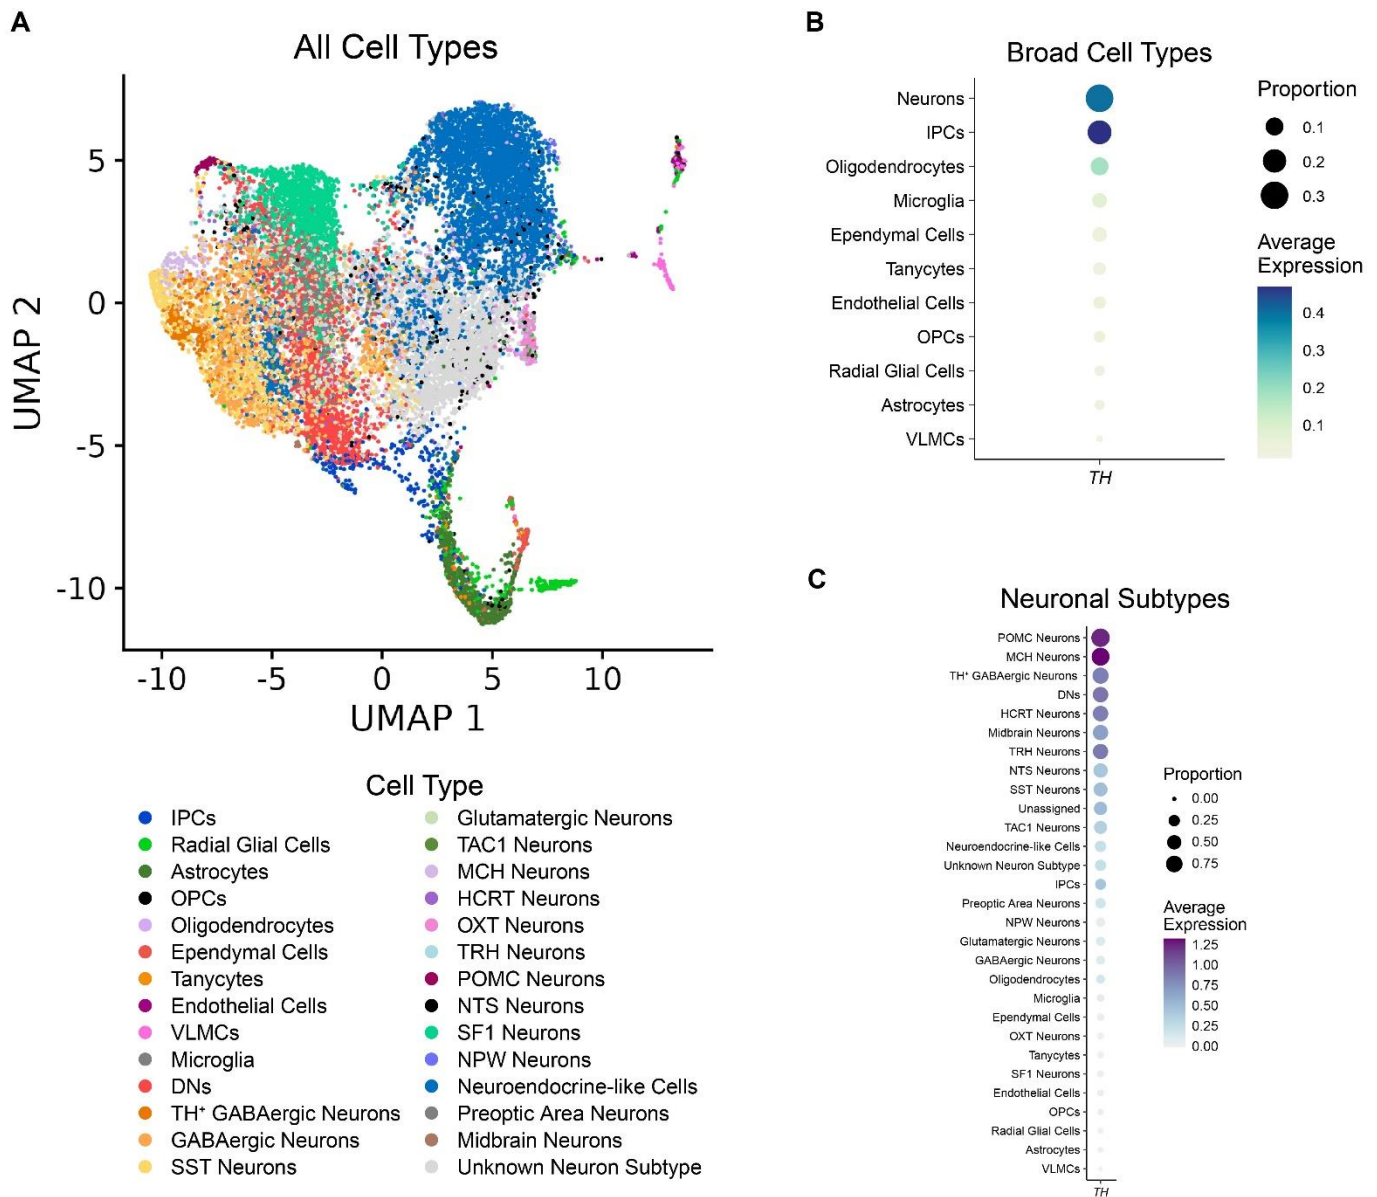

**Figure S7 – Overview of all clusters and TH expression.**

A) UMAP plot of all cell types consisting of the broad cell type and neuronal subtype categories in hypothalamus organoids.

B) Dot plot showing *TH* expression level and proportion of cells expressing *TH* in the broad cell types.

C) Dot plot showing *TH* expression level and proportion of cells expressing *TH* in the neuronal subtypes.

Related to Figure 3.



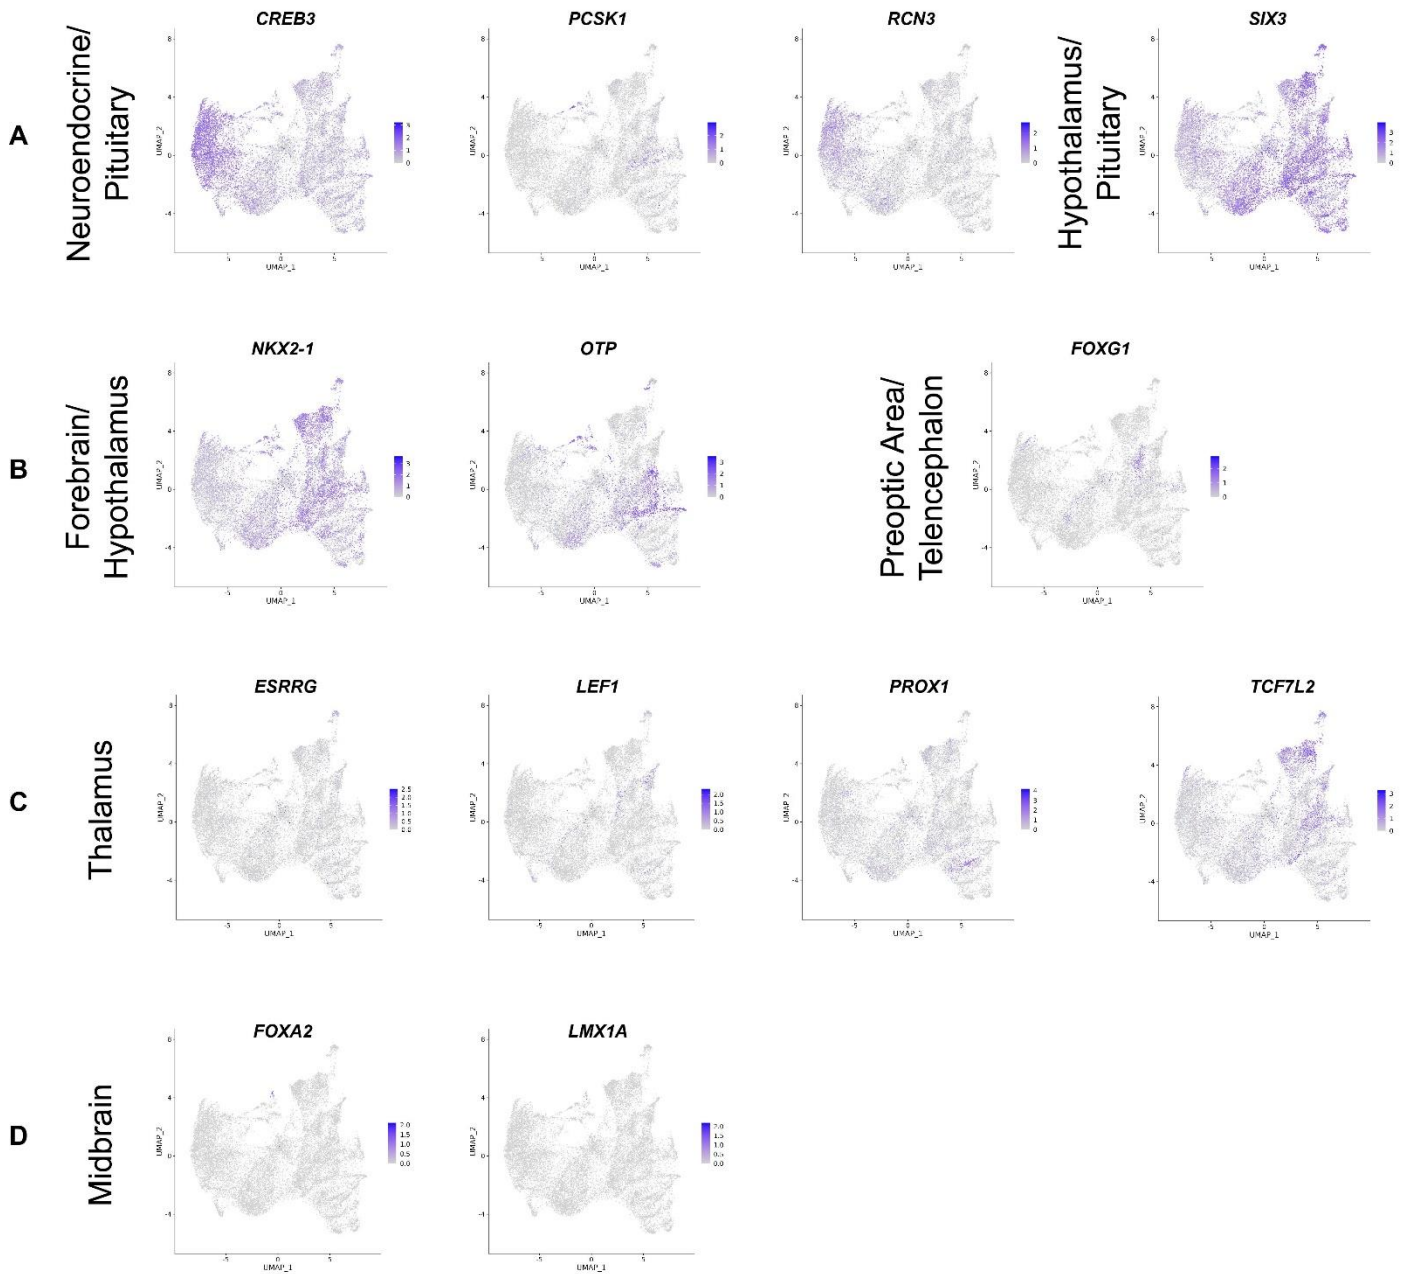

**Figure S8 – Expression of cell type- and region-specific markers in hypothalamus organoids.**

A) UMAP plots showing the expression of neuroendocrine and pituitary markers, as well as *SIX3* which is expressed in both the hypothalamus and pituitary cells.

B) UMAP plots showing the expression of forebrain, hypothalamus, and preoptic area/ventral telencephalon markers.

C) UMAP plots showing the expression of thalamus markers.

D) UMAP plots showing the expression of midbrain markers.

Related to Figure 3.

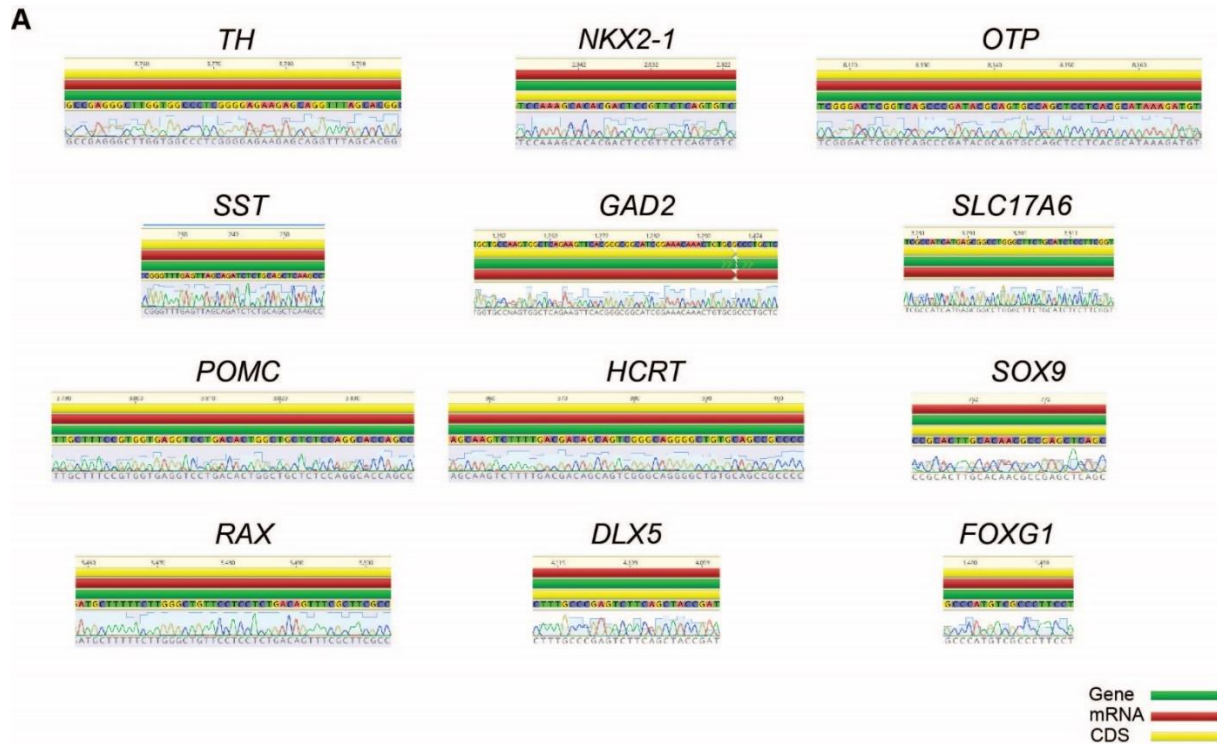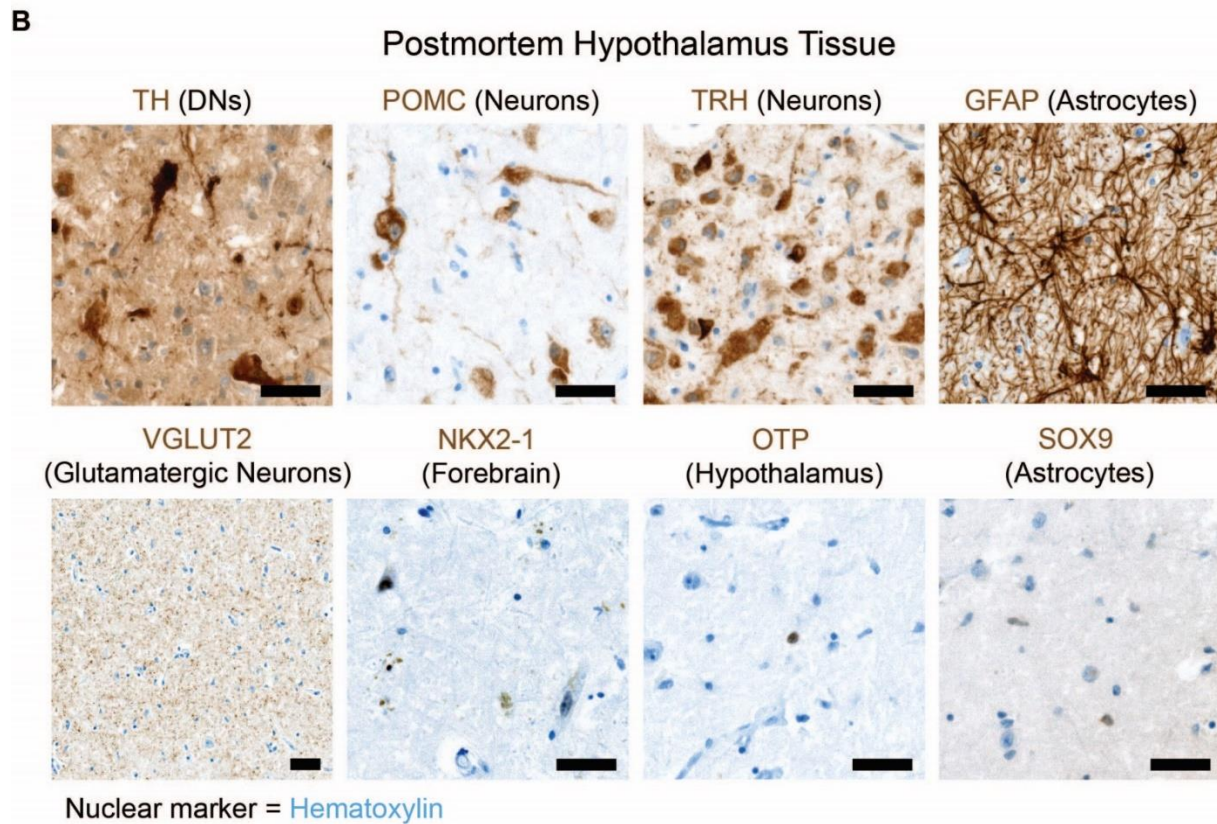

**Figure S9 – Validation of qRT-PCR primers and IHC antibodies used in this study.**

A) Sequencing alignments of qRT-PCR primer PCR products with the gene, mRNA, and coding sequence (CDS) of their corresponding genes, validating the primers for each marker.

B) IHC stains for cell type-specific markers in postmortem hypothalamus tissue. Hematoxylin was used as a nuclear marker in all images. Scale bars: 50  $\mu$ m.

Related to Figure 4.



## Supplemental References

1. Hasel, P., Dando, O., Jiwaji, Z., Baxter, P., Todd, A.C., Heron, S., Márkus, N.M., McQueen, J., Hampton, D.W., Torvell, M., et al. (2017). Neurons and neuronal activity control gene expression in astrocytes to regulate their development and metabolism. *Nat Commun* 8:15132. 10.1038/ncomms15132.
2. Brykczynska, U., Geigges, M., Wiedemann, S.J., Dror, E., Böni-Schnetzler, M., Hess, C., Donath, M.Y., and Paro, R. (2020). Distinct transcriptional responses across tissue-resident macrophages to short-term and long-term metabolic challenge. *Cell Rep* 30(5):1627-1643.e7. 10.1016/j.celrep.2020.01.005.
3. McClellan, K.M., Parker, K.L., and Tobet, S. (2006). Development of the ventromedial nucleus of the hypothalamus. *Front Neuroendocrinol* 27(2):193-209. 10.1016/J.YFRNE.2006.02.002.
4. Tsuneoka, Y. and Funato, H. (2021). Cellular composition of the preoptic area regulating sleep, parental, and sexual behavior. *Front Neurosci* 15: 649159. 10.3389/fnins.2021.649159.
5. Zhou, X., Lu, Y., Zhao, F., Dong, J., Ma, W., Zhong, S., Wang, M., Wang, B., Zhao, Y., Shi, Y., et al. (2022). Deciphering the spatial-temporal transcriptional landscape of human hypothalamus development. *Cell Stem Cell* 29(2):328-343.e5. 10.1016/j.stem.2021.11.009.
6. Liu, C., Goshu, E., Wells, A., and Fan, C.M. (2003). Identification of the downstream targets of SIM1 and ARNT2, a pair of transcription factors essential for neuroendocrine cell differentiation. *J Biol Chem* 278(45):44857-44867. 10.1074/jbc.M304489200.
7. Maggi, R., Zasso, J., and Conti, L. (2015). Neurodevelopmental origin and adult neurogenesis of the neuroendocrine hypothalamus. *Front Cell Neurosci* 8:440. 10.3389/fncel.2014.00440.
8. Michaud, J.L., Derossi, C., May, N.R., Holdener, B.C., and Fan, C.M. (2000). ARNT2 acts as the dimerization partner of SIM1 for the development of the hypothalamus. *Mech Dev* 90(2):253-261. 10.1016/s0925-4773(99)00328-7.
9. Qin, C., Li, J., and Tang, K. (2018). The paraventricular nucleus of the hypothalamus: development, function, and human diseases. *Endocrinology* 159(9):3458-3472. 10.1210/en.2018-00453.
10. Abcam. Neural markers. <https://www.abcam.com/neuroscience/neural-markers-guide> (Accessed 10 July 2023).
11. Orquera, D.P., Nasif, S., Low, M.J., Rubinstein, M., and de Souza, F.S.J. (2016). Essential function of the transcription factor Rax in the early patterning of the mammalian hypothalamus. *Dev Biol* 416(1):212-224. 10.1016/j.ydbio.2016.05.021.
12. Leid, M., Ishmael, J.E., Avram, D., Shepherd, D., Fraulob, V., and Dollé, P. (2004). CTIP1 and CTIP2 are differentially expressed during mouse embryogenesis. *Gene Expr Patterns* 4(6):733-739. 10.1016/j.modgep.2004.03.009.
13. Simon, R., Wiegrefe, C., and Britsch, S. (2020). Bcl11 transcription factors regulate cortical development and function. *Front Mol Neurosci* 13:51. 10.3389/fnmol.2020.00051.
14. Tolve, M., Ulusoy, A., Patikas, N., Islam, K.U.S., Bodea, G.O., Öztürk, E., Broske, B., Mentani, A., Wagener, A., van Loo, K.M.J., et al. (2021). The transcription factor BCL11A defines distinct subsets of midbrain dopaminergic neurons. *Cell Rep* 36(11):109697. 10.1016/j.celrep.2021.109697.
15. Sanghera, M.K., Zamora, J.L., and German, D.C. (1995). Calbindin-D28k-containing neurons in the human hypothalamus: relationship to dopaminergic neurons. *Neurodegeneration* 4(4):375-381. 10.1006/NEUR.1995.0045.
16. Kim, D.W., Place, E., Chinnaiya, K., Manning, E., Sun, C., Dai, W., Groves, I., Ohyama, K., Burbridge, S., Placzek, M., et al. (2022). Single-cell analysis of early chick hypothalamic development reveals that hypothalamic cells are induced from prethalamic-like progenitors. *Cell Rep* 38(3):110251. 10.1016/j.celrep.2021.110251.
17. Nemoto, C., Hida, T., and Arai, R. (1999). Calretinin and calbindin-D28k in dopaminergic neurons of the rat midbrain: a triple-labeling immunohistochemical study. *Brain Res* 846(1):129-136. 10.1016/S0006-8993(99)01950-2.
18. Lau, J., Farzi, A., Qi, Y., Heilbronn, R., Mietzsch, M., Shi, Y.C., and Herzog, H. (2018). CART neurons in the arcuate nucleus and lateral hypothalamic area exert differential controls on energy homeostasis. *Mol Metab* 7:102-118. 10.1016/j.molmet.2017.10.015.
19. Gardiner, J. v., Beale, K.E., Roy, D., Boughton, C.K., Bataveljic, A., Campbell, D.C., Bewick, G.A., Patel, N.A., Patterson, M., Leavy, E.M., et al. (2010). Cerebellin1 is a novel orexigenic peptide. *Diabetes Obes Metab* 12(10):883-890. 10.1111/J.1463-1326.2010.01247.X.
20. Rucinski, M., and Malendowicz, L.K. (2009). Precerebellin-related genes and precerebellin 1 peptide in endocrine glands of the rat - Pattern of their expression. *Int J Mol Med* 23(1):113-119. 10.3892/ijmm\_00000108.
21. Stilling, G.A., Bayliss, J.M., Jin, L., Zhang, H., and Lloyd, R. v. (2005). Chromogranin A transcription and gene expression in Folliculostellate (TtT/GF) cells inhibit cell growth. *Endocr Pathol* 16(3):173-186. 10.1385/EP:16:3:173.

22. Sampieri, L., di Giusto, P., and Alvarez, C. (2019). CREB3 transcription factors: ER-golgi stress transducers as hubs for cellular homeostasis. *Front Cell Dev Biol* 7:123. 10.3389/fcell.2019.00123.
23. Bell, C. and Mann, R. (1990). Identification of dopaminergic nerves in humans. *Am J Hypertens* 3(6 Pt 2):4S-6S. 10.1093/ajh/3.6.4s.
24. Weihe, E., Depboylu, C., Schütz, B., Schäfer, M.K.H., and Eiden, L.E. (2006). Three types of tyrosine hydroxylase-positive CNS neurons distinguished by dopa decarboxylase and VMAT2 co-expression. *Cell Mol Neurobiol* 26(4-6):659–678. 10.1007/s10571-006-9053-9.
25. Lee, B., Kim, J., An, T., Kim, S., Patel, E.M., Raber, J., Lee, S.K., Lee, S., and Lee, J.W. (2018). Dlx1/2 and Otp coordinate the production of hypothalamic GHRH- and AgRP-neurons. *Nat Commun* 9(1):2026. 10.1038/s41467-018-04377-4.
26. de Lombares, C., Heude, E., Alfama, G., Fontaine, A., Hassouna, R., Vernochet, C., de Chaumont, F., Olivo-Marin, C., Ey, E., et al. (2019). Dlx5 and Dlx6 expression in GABAergic neurons controls behavior, metabolism, healthy aging and lifespan. *Aging* 11(17): 6638-6656. 10.18632/aging.102141.
27. Tanapat, P. (2013). Neuronal cell markers. *Mater Methods* 3:196. 10.13070/mm.en.3.196.
28. Liu, C.C., Wang, H., Wang, W. da, Wang, L., Liu, W.J., Wang, J.H., Geng, Q.R., and Lu, Y. (2018). ENO2 promotes cell proliferation, glycolysis, and glucocorticoid-resistance in acute lymphoblastic leukemia. *Cell Physiol Biochem* 46(4):1525-1535. 10.1159/000489196.
29. Aslanpour, S., Han, S., Schuurmans, C., and Kurrasch, D.M. (2020). Neurog2 acts as a classical proneural gene in the ventromedial hypothalamus and is required for the early phase of neurogenesis. *J Neurosci* 40(18):3549-3563. 10.1523/JNEUROSCI.2610-19.2020.
30. Kotan, L.D., Ian Hutchins, B., Ozkan, Y., Demirel, F., Stoner, H., Cheng, P.J., Esen, I., Gurbuz, F., Kenan Bicakci, Y., Mengen, E., et al. (2014). Mutations in FEZF1 cause kallmann syndrome. *Am J Hum Genet* 95(3):326-331. 10.1016/j.ajhg.2014.08.006.
31. Kurrasch, D.M., Cheung, C.C., Lee, F.Y., Tran, P. v., Hata, K., and Ingraham, H.A. (2007). The neonatal ventromedial hypothalamus transcriptome reveals novel markers with spatially distinct patterning. *J Neurosci* 27(50):13624-34. 10.1523/JNEUROSCI.2858-07.2007.
32. Quenneville, S., Labouèbe, G., Basco, D., Metref, S., Viollet, B., Foretz, M., and Thorens, B. (2020). Hypoglycemia-sensing neurons of the ventromedial hypothalamus require AMPK-induced TXN2 expression but are dispensable for physiological counterregulation. *Diabetes* 69(11):2253-2266. 10.2337/db20-0577.
33. Bullitt, E. (1990). Expression of c-fos-like protein as a marker for neuronal activity following noxious stimulation in the rat. *J Comp Neurol* 296(4):517-530. 10.1002/CNE.902960402.
34. Merkle, F.T., Maroof, A., Wataya, T., Sasai, Y., Studer, L., Eggan, K., and Schier, A.F. (2015). Generation of neuropeptidergic hypothalamic neurons from human pluripotent stem cells. *Development* 142(4):633-643. 10.1242/dev.117978.
35. Khanh, D. v., Choi, Y.H., Moh, S.H., Kinyua, A.W., and Kim, K.W. (2014). Leptin and insulin signaling in dopaminergic neurons: relationship between energy balance and reward system. *Front Psychol* 5:846. 10.3389/fpsyg.2014.00846.
36. Huisman, C., Cho, H., Brock, O., Lim, S.J., Youn, S.M., Park, Y., Kim, S., Lee, S.K., Delogu, A., and Lee, J.W. (2019). Single cell transcriptome analysis of developing arcuate nucleus neurons uncovers their key developmental regulators. *Nat Commun* 10(1):3696. 10.1038/s41467-019-11667-y.
37. St-Amand, J., Yoshioka, M., Tanaka, K., and Nishida, Y. (2012). Transcriptome-wide identification of preferentially expressed genes in the hypothalamus and pituitary gland. *Front Endocrinol* 2:111. 10.3389/fendo.2011.00111.
38. Sun, Y., Bak, B., Schoenmakers, N., van Trotsenburg, A.S.P., Oostdijk, W., Voshol, P., Cambridge, E., White, J.K., le Tissier, P., Gharavy, S.N.M., et al. (2012). Loss-of-function mutations in IGSF1 cause an X-linked syndrome of central hypothyroidism and testicular enlargement. *Nat Genet* 44(12):1375-1381. 10.1038/ng.2453.
39. Kubota, N., Terauchi, Y., Tobe, K., Yano, W., Suzuki, R., Ueki, K., Takamoto, I., Satoh, H., Maki, T., Kubota, T., et al. (2004). Insulin receptor substrate 2 plays a crucial role in  $\beta$  cells and the hypothalamus. *J Clin Invest* 114(7):917-927. 10.1172/jci200421484.
40. Nasif, S., de Souza, F.S.J., González, L.E., Yamashita, M., Orquera, D.P., Low, M.J., and Rubinstein, M. (2015). Islet 1 specifies the identity of hypothalamic melanocortin neurons and is critical for normal food intake and adiposity in adulthood. *Proc Natl Acad Sci U S A* 112(15):E1861-E1870. 10.1073/pnas.1500672112.
41. Hibino, H., Inanobe, A., Furutani, K., Murakami, S., Findlay, I., and Kurachi, Y. (2010). Inwardly rectifying potassium channels: their structure, function, and physiological roles. *Physiol Rev* 90(1):291-366. 10.1152/physrev.00021.2009.
42. Laque, A., Zhang, Y., Gettys, S., Nguyen, T.A., Bui, K., Morrison, C.D., and Münzberg, H. (2013). Leptin receptor neurons in the mouse hypothalamus are colocalized with the neuropeptide galanin and mediate anorexigenic leptin action. *Am J Physiol Endocrinol Metab* 304(9):E999-1011. 10.1152/ajpendo.00643.2012.

43. Bedont, J.L., LeGates, T.A., Slat, E.A., Byerly, M.S., Wang, H., Hu, J., Rupp, A.C., Qian, J., Wong, G.W., Herzog, E.D., et al. (2014). Lhx1 controls terminal differentiation and circadian function of the suprachiasmatic nucleus. *Cell Rep* 7(3):609-622. 10.1016/j.celrep.2014.03.060.
44. Peukert, D., Weber, S., Lumsden, A., and Scholpp, S. (2011). Lhx2 and Lhx9 determine neuronal differentiation and compartment in the caudal forebrain by regulating Wnt signaling. *PLoS Biol* 9(12):e1001218. 10.1371/journal.pbio.1001218.
45. Sheng, H.Z., Bertuzzi, S., Chiang, C., Shawlot, W., Taira, M., Dawid, I., and Westphal, H. (1997). Expression of murine Lhx5 suggests a role in specifying the forebrain. *Dev Dyn* 208(2):266-277. 10.1002/(SICI)1097-0177(199702)208:2<266::AID-AJA13>3.0.CO;2-1.
46. Cai, J., Donaldson, A., Yang, M., German, M.S., Enikolopov, G., and Iacovitti, L. (2009). The role of Lmx1a in the differentiation of human embryonic stem cells into midbrain dopamine neurons in culture and after transplantation into a Parkinson's disease model. *Stem Cells* 27(1):220-229. 10.1634/stemcells.2008-0734.
47. Vitalis, T., Fouquet, C., Alvarez, C., Seif, I., Price, D., Gaspar, P., and Cases, O. (2002). Developmental expression of monoamine oxidases A and B in the central and peripheral nervous systems of the mouse. *J Comp Neurol* 442(2):331-347. 10.1002/CNE.10093.
48. Forouzanfar, M., Lachinani, L., Dormiani, K., Nasr-Esfahani, M.H., Gure, A.O., and Ghaedi, K. (2020). Intracellular functions of RNA-binding protein, Musashi1, in stem and cancer cells. *Stem Cell Res Ther* 11(1):193. 10.1186/s13287-020-01703-w.
49. Miczán, V., Kelemen, K., Glavinics, J.R., László, Z.I., Barti, B., Kenesei, K., Kisfali, M., and Katona, I. (2021). Necab1 and necab2 are prevalent calcium-binding proteins of cb1/cck-positive gabaergic interneurons. *Cerebral Cortex* 31(3):1786-1806. 10.1093/cercor/bhaa326.
50. Niimi, M. and Murao, K. (2005). Neuropeptide W as a stress mediator in the hypothalamus. *Endocrine* 27(1):51-54. 10.1385/ENDO:27:1:051.
51. Feng, S., Xing, C., Shen, T., Qiao, Y., Wang, R., Chen, J., Liao, J., Lu, Z., Yang, X., Abd-Allah, S.M., et al. (2017). Abnormal paraventricular nucleus of hypothalamus and growth retardation associated with loss of nuclear receptor gene COUP-TFII. *Sci Rep* 7(1):5282. 10.1038/s41598-017-05682-6.
52. Schmouth, J.F., Castellarin, M., Laprise, S., Banks, K.G., Bonaguro, R.J., McInerney, S.C., Borretta, L., Amirabbasi, M., Korecki, A.J., Portales-Casamar, E., et al. (2013). Non-coding-regulatory regions of human brain genes delineated by bacterial artificial chromosome knock-in mice. *BMC Biol* 11:106. 10.1186/1741-7007-11-106.
53. Coutinho, E.A., Okamoto, S., Ishikawa, A.W., Yokota, S., Wada, N., Hirabayashi, T., Saito, K., Sato, T., Takagi, K., Wang, C.C., et al. (2017). Activation of SF1 neurons in the ventromedial hypothalamus by DREADD technology increases insulin sensitivity in peripheral tissues. *Diabetes* 66(9):2372-2386. 10.2337/db16-1344.
54. Shima, Y., Zubair, M., Ishihara, S., Shinohara, Y., Oka, S., Kimura, S., Okamoto, S., Minokoshi, Y., Suita, S., and Morohashi, K.I. (2005). Ventromedial hypothalamic nucleus-specific enhancer of Ad4BP/SF-1 gene. *Mol Endocrinol* 19(11):2812-2823. 10.1210/me.2004-0431.
55. Atkin, S.D., Owen, B.M., Bookout, A.L., Cravo, R.M., Lee, C., Elias, C.F., Elmquist, J.K., Kliewer, S.A., and Mangelsdorf, D.J. (2013). Nuclear receptor LHR-1 induces the reproductive neuropeptide kisspeptin in the hypothalamus. *Mol Endocrinol* 27(4):598-605. 10.1210/me.2012-1371.
56. Brown, J.A., Wright, A., Bugescu, R., Christensen, L., Olson, D.P., and Leininger, G.M. (2019). Distinct subsets of lateral hypothalamic neurotensin neurons are activated by leptin or dehydration. *Sci Rep* 9(1):1873. 10.1038/s41598-018-38143-9.
57. Kahn, D., Abrams, G.M., Zimmerman, E.A., Carraway, R., and Leeman, S.E. (1980). Neurotensin neurons in the rat hypothalamus: an immunocytochemical study. *Endocrinology* 107(1):47-54. 10.1210/ENDO-107-1-47.
58. Swaab, D.F., Hofman, M.A., Lucassen, P.J., Purba, J.S., Raadsheer, F.C., and Van de Nes, J.A.P. (1993). Functional neuroanatomy and neuropathology of the human hypothalamus. *Anat Embryol (Berl)* 187(4):317-330. 10.1007/BF00185889.
59. Chung, Y., Kim, J., Im, E., Kim, H., and Yang, H. (2015). Progesterone and 17 $\beta$ -estradiol regulate expression of nesfatin-1/NUCB2 in mouse pituitary gland. *Peptides* 63:4-9. 10.1016/J.PEPTIDES.2014.10.011.
60. Kelley, C.G., Lavorgna, G., Clark, M.E., Boncinelli, E., and Mellon, P.L. (2000). The Otx2 homeoprotein regulates expression from the gonadotropin-releasing hormone proximal promoter. *Mol Endocrinol* 14(8):1246-56. 10.1210/mend.14.8.0509.
61. Panman, L., Papathanou, M., Laguna, A., Oosterveen, T., Volakakis, N., Acampora, D., Kurtzdotter, I., Yoshitake, T., Kehr, J., Joodmardi, E., et al. (2014). Sox6 and Otx2 control the specification of substantia nigra and ventral tegmental area dopamine neurons. *Cell Rep* 8(4):1018-1025. 10.1016/j.celrep.2014.07.016.
62. Renelt, M., von Bohlen und Halbach, V., and von Bohlen und Halbach, O. (2014). Distribution of PCP4 protein in the forebrain of adult mice. *Acta Histochem* 116(6):1056-1061. 10.1016/J.ACTHIS.2014.04.012.

63. Greenwood, M., Paterson, A., Rahman, P.A., Gillard, B.T., Langley, S., Iwasaki, Y., Murphy, D., and Greenwood, M.P. (2020). Transcription factor Creb3l1 regulates the synthesis of prohormone convertase enzyme PC1/3 in endocrine cells. *J Neuroendocrinol* 32(4):e12851. 10.1111/jne.12851.
64. Schneeberger, M., Tan, K., Nectow, A.R., Parolari, L., Caglar, C., Azevedo, E., Li, Z., Domingos, A., and Friedman, J.M. (2018). Functional analysis reveals differential effects of glutamate and MCH neuropeptide in MCH neurons. *Mol Metab* 13:83-89. 10.1016/j.molmet.2018.05.001.
65. Millington, G.W.M. (2007). The role of proopiomelanocortin (POMC) neurones in feeding behaviour. *Nutr Metab* 4:18. 10.1186/1743-7075-4-18.
66. Acampora, D., Postiglione, M.P., Avantaggiato, V., Bonito, M. di, Vaccarino, F.M., Michaud, J., and Simeone, A. (1999). Progressive impairment of developing neuroendocrine cell lineages in the hypothalamus of mice lacking the Orthopedia gene. *Genes Dev* 13(21):2787-800. 10.1101/gad.13.21.2787.
67. Nakai, S., Kawano, H., Yudate, T., Nishi, M., Kuno, J., Nagata, A., Jishage, K., Hamada, H., Fujii, H., Kawamura, K., et al. (1995). The POU domain transcription factor Brn-1 is required for the determination of specific neuronal lineages in the hypothalamus of the mouse. *Genes Dev* 9(24):3109-21. 10.1101/gad.9.24.3109.
68. Huang, W.K., Wong, S.Z.H., Pather, S.R., Nguyen, P.T.T., Zhang, F., Zhang, D.Y., Zhang, Z., Lu, L., Fang, W., Chen, L., et al. (2021). Generation of hypothalamic arcuate organoids from human induced pluripotent stem cells. *Cell Stem Cell* 28(9):1657-1670.e10. 10.1016/j.stem.2021.04.006.
69. Hu, R., Han, Z., Song, H., Peng, Y., Huang, Q., Ren, S., Gu, Y., Huang, C., Li, Y., Jiang, C., et al. (2000). Gene expression profiling in the human hypothalamus-pituitary-adrenal axis and full-length cDNA cloning. *Proc Natl Acad Sci U S A* 97(17):9543-8. 10.1073/pnas.160270997.
70. Tsuji, A., Kikuchi, Y., Sato, Y., Koide, S., Yuasa, K., Nagahama, M., and Matsuda, Y. (2006). A proteomic approach reveals transient association of reticulocalbin-3, a novel member of the CREC family, with the precursor of subtilisin-like proprotein convertase, PACE4. *Biochem J* 396(1):51-59. 10.1042/BJ20051524.
71. Cohen-Kashi Malina, K., Tsivourakis, E., Kushinsky, D., Apelblat, D., Shtiglitz, S., Zohar, E., Sokoletsky, M., Tasaka, G. ichi, Mizrahi, A., Lampl, I., et al. (2021). NDNF interneurons in layer 1 gain-modulate whole cortical columns according to an animal's behavioral state. *Neuron* 109(13):2150-2164.e5. 10.1016/j.neuron.2021.05.001.
72. Huang, Y., Song, N.N., Lan, W., Hu, L., Su, C.J., Ding, Y.Q., and Zhang, L. (2013). Expression of transcription factor Satb2 in adult mouse brain. *Anat Rec* 296(3):452-461. 10.1002/ar.22656.
73. Zhang, Q., Zhang, L., Huang, Y., Ma, P., Mao, B., Ding, Y.Q., and Song, N.N. (2021). Satb2 regulates the development of dopaminergic neurons in the arcuate nucleus by Dlx1. *Cell Death Dis* 12(10):879. 10.1038/s41419-021-04175-9.
74. Asuzu, D.T., Alvarez, R., Fletcher, P.A., Mandal, D., Johnson, K., Wu, W., Elkahloun, A., Clavijo, P., Allen, C., Maric, D., et al. (2022). Pituitary adenomas evade apoptosis via noxa deregulation in Cushing's disease. *Cell Rep* 40(8):111223. 10.1016/j.celrep.2022.111223.
75. Fletcher, P.A., Smiljanic, K., Maso Prévède, R., Iben, J.R., Li, T., Rokic, M.B., Sherman, A., Coon, S.L., and Stojilkovic, S.S. (2019). Cell type- and sex-dependent transcriptome profiles of rat anterior pituitary cells. *Front Endocrinol* 10:623. 10.1016/j.fendo.2019.00623.
76. Pandolfi, E.C., Tonsfeldt, K.J., Hoffmann, H.M., and Mellon, P.L. (2019). Deletion of the homeodomain protein six6 from gnRH neurons decreases gnRH gene expression, resulting in infertility. *Endocrinology* 160(9):2151-2164. 10.1210/en.2019-00113.
77. Tafoya, L.C.R., Mamedi, M., Miyashita, T., Guzowski, J.F., Valenzuela, C.F., and Wilson, M.C. (2006). Expression and function of SNAP-25 as a universal SNARE component in GABAergic neurons. *J Neurosci* 26(30):7826-7838. 10.1523/JNEUROSCI.1866-06.2006.
78. Stengel, A. and Taché, Y. (2019). Central somatostatin signaling and regulation of food intake. In *Ann N Y Acad Sci*, 1455(1):98-104. 10.1111/nyas.14178.
79. He, Z.X., Yin, Y.Y., Xi, K., Xing, Z.K., Cao, J.B., Liu, T.Y., Liu, L., He, X.X., Yu, H.L., and Zhu, X.J. (2020). Nucleus accumbens Tac1-expressing neurons mediate stress-induced anhedonia-like behavior in mice. *Cell Rep* 33(5):108343. 10.1016/j.celrep.2020.108343.
80. Navarro, V.M., Bosch, M.A., León, S., Simavli, S., True, C., Pinilla, L., Carroll, R.S., Seminara, S.B., Tena-Sempere, M., Rønnekleiv, O.K., et al. (2015). The integrated hypothalamic tachykinin-kisspeptin system as a central coordinator for reproduction. *Endocrinology*, 156(2):627-637. 10.1210/en.2014-1651.
81. Zhao, Z., Yang, Y., Walker, D.L., and Davis, M. (2009). Effects of substance P in the amygdala, ventromedial hypothalamus, and periaqueductal gray on fear-potentiated startle. *Neuropsychopharmacology* 34(2):331-340. 10.1038/npp.2008.55.
82. Lechan, R.M. and Fekete, C. (2006). The TRH neuron: a hypothalamic integrator of energy metabolism. *Prog Brain Res* 153:209-235. 10.1016/S0079-6123(06)53012-2.

83. Mace, J.D., Tachibana, T., Wang, G., Newmyer, B.A., Williams, E., Gilbert, E.R., and Cline, M.A. (2014). Substance P is associated with hypothalamic paraventricular nucleus activation that coincides with increased urotensin 2 mRNA in chicks. *Neuropeptides* 48(5):305-311. 10.1016/J.NPEP.2014.06.001.
84. Foglesong, G.D., Huang, W., Liu, X., Slater, A.M., Siu, J., Yildiz, V., Salton, S.R.J., and Cao, L. (2016). Role of hypothalamic VGF in energy balance and metabolic adaptation to environmental enrichment in mice. *Endocrinology* 157(3):983-996. 10.1210/en.2015-1627.
85. Salton, S.R.J., Ferri, G.L., Hahm, S., Snyder, S.E., Wilson, A.J., Possenti, R., and Levi, A. (2000). VGF: a novel role for this neuronal and neuroendocrine polypeptide in the regulation of energy balance. *Front Neuroendocrinol* 21(3):199-219. 10.1006/FRNE.2000.0199.
